# Supplementary material for: APID database: redefining protein–protein interaction experimental evidences and binary interactomes
Source: Database (Oxford). 2019 Jan 31;2019:baz005. doi: 10.1093/database/baz005 (PMC6354026; doi:10.1093/database/baz005)
Supplement: Supplementary Table 1 [file database_alonsoetal2018-supplementary-table_s1_baz005.xlsx]

## Sheet: Redefining MI Detection Methods
PSI-MI ID	PSI-MI ID number	PSI-MI Terms (linked to "Interaction Dectection Method") (https://www.ebi.ac.uk/ols/ontologies/MI/terms?obo_id=MI:0001)	Method_Type	Binary unified detection Method	MI:id of Binary Unified Detection Method (used to avoid "duplicate" evidences) (1)	Number of "Curation Events" in APID all	Number of "Curation Events" in APID human
MI:0008	8	array technology	binary	8	MI:0008 array technology	72	62
MI:0081	81	peptide array	binary	8	MI:0008 array technology	2731	1656
MI:0089	89	protein array	binary	8	MI:0008 array technology	2839	1235
MI:0092	92	protein in situ array	binary	8	MI:0008 array technology	25	0
MI:0095	95	proteinchip(r) on a surface-enhanced laser desorption/ionization	binary	8	MI:0008 array technology	2	1
MI:0678	678	antibody array	binary	8	MI:0008 array technology	99	60
MI:0012	12	bioluminescence resonance energy transfer	binary	12	MI:0012 bioluminescence resonance energy transfer	140	107
MI:0055	55	fluorescent resonance energy transfer	binary	12	MI:0012 bioluminescence resonance energy transfer	2836	1155
MI:0905	905	amplified luminescent proximity homogeneous assay	binary	12	MI:0012 bioluminescence resonance energy transfer	102	26
MI:1016	1016	fluorescence recovery after photobleaching	binary	12	MI:0012 bioluminescence resonance energy transfer	8	2
MI:1030	1030	excimer fluorescence	binary	12	MI:0012 bioluminescence resonance energy transfer	0	0
MI:2171	2171	complemented donor-acceptor resonance energy transfer	binary	12	MI:0012 bioluminescence resonance energy transfer	0	0
MI:0018	18	two hybrid	binary	18	MI:0018 two-hybrid	206357	71969
MI:0112	112	ubiquitin reconstruction	binary	18	MI:0018 two-hybrid	15702	399
MI:0232	232	transcriptional complementation assay	binary	18	MI:0018 two-hybrid	61	9
MI:0369	369	lex-a dimerization assay	binary	18	MI:0018 two-hybrid	47	28
MI:0397	397	two hybrid array	binary	18	MI:0018 two-hybrid	58703	20813
MI:0398	398	two hybrid pooling approach	binary	18	MI:0018 two-hybrid	29729	6738
MI:0399	399	two hybrid fragment pooling approach	binary	18	MI:0018 two-hybrid	2856	932
MI:0438	438	rna three hybrid	binary	18	MI:0018 two-hybrid	0	0
MI:0655	655	lambda repressor two hybrid	binary	18	MI:0018 two-hybrid	35	19
MI:0726	726	reverse two hybrid	binary	18	MI:0018 two-hybrid	5	2
MI:0727	727	lexa b52 complementation	binary	18	MI:0018 two-hybrid	44	28
MI:0728	728	gal4 vp16 complementation	binary	18	MI:0018 two-hybrid	59	31
MI:1111	1111	two hybrid bait or prey pooling approach	binary	18	MI:0018 two-hybrid	0	0
MI:1112	1112	two hybrid prey pooling approach	binary	18	MI:0018 two-hybrid	14119	13754
MI:1113	1113	two hybrid bait and prey pooling approach	binary	18	MI:0018 two-hybrid	604	604
MI:1203	1203	split luciferase complementation	binary	18	MI:0018 two-hybrid	785	152
MI:1320	1320	membrane yeast two hybrid	binary	18	MI:0018 two-hybrid	0	0
MI:1356	1356	validated two hybrid	binary	18	MI:0018 two-hybrid	18010	14525
MI:2215	2215	barcode fusion genetics two hybrid	binary	18	MI:0018 two-hybrid	767	767
MI:2277	2277	Cr-two hybrid	binary	18	MI:0018 two-hybrid	9033	0
MI:0030	30	cross-linking study	binary	30	MI:0030 cross-linking study	9644	7347
MI:0031	31	protein cross-linking with a bifunctional reagent	binary	30	MI:0030 cross-linking study	63	10
MI:0430	430	nucleic acid uv cross-linking assay	binary	30	MI:0030 cross-linking study	0	0
MI:0009	9	bacterial display	binary	34	MI:0034 display technology	0	0
MI:0034	34	display technology	binary	34	MI:0034 display technology	957	957
MI:0048	48	filamentous phage display	binary	34	MI:0034 display technology	15	6
MI:0066	66	lambda phage display	binary	34	MI:0034 display technology	15	4
MI:0073	73	mrna display	binary	34	MI:0034 display technology	0	0
MI:0084	84	phage display	binary	34	MI:0034 display technology	474	209
MI:0098	98	ribosome display	binary	34	MI:0034 display technology	0	0
MI:0108	108	t7 phage display	binary	34	MI:0034 display technology	5	4
MI:0115	115	yeast display	binary	34	MI:0034 display technology	10	5
MI:0899	899	p3 filamentous phage display	binary	34	MI:0034 display technology	0	0
MI:0900	900	p8 filamentous phage display	binary	34	MI:0034 display technology	0	0
MI:0010	10	beta galactosidase complementation	binary	90	MI:0090 protein complementation assay	72	28
MI:0011	11	beta lactamase complementation	binary	90	MI:0090 protein complementation assay	34	16
MI:0014	14	adenylate cyclase complementation	binary	90	MI:0090 protein complementation assay	465	0
MI:0090	90	protein complementation assay	binary	90	MI:0090 protein complementation assay	22660	578
MI:0111	111	dihydrofolate reductase reconstruction	binary	90	MI:0090 protein complementation assay	3566	6
MI:0231	231	mammalian protein protein interaction trap	binary	90	MI:0090 protein complementation assay	239	186
MI:0370	370	tox-r dimerization assay	binary	90	MI:0090 protein complementation assay	45	44
MI:0809	809	bimolecular fluorescence complementation	binary	90	MI:0090 protein complementation assay	1814	846
MI:0895	895	protein kinase A complementation	binary	90	MI:0090 protein complementation assay	0	0
MI:0916	916	lexa vp16 complementation	binary	90	MI:0090 protein complementation assay	0	0
MI:1037	1037	split renilla luciferase complementation	binary	90	MI:0090 protein complementation assay	11	4
MI:1204	1204	split firefly luciferase complementation	binary	90	MI:0090 protein complementation assay	101	3
MI:0099	99	scintillation proximity assay	binary	99	MI:0099 scintillation proximity assay	66	61
MI:0425	425	kinase scintillation proximity assay	binary	99	MI:0099 scintillation proximity assay	1	1
MI:0107	107	surface plasmon resonance	binary	107	MI:0107 surface plasmon resonance	2650	1552
MI:0921	921	surface plasmon resonance array	binary	107	MI:0107 surface plasmon resonance	0	0
MI:0411	411	enzyme linked immunosorbent assay	binary	411	MI:0411 enzyme linked immunosorbent assay	874	428
MI:0813	813	proximity enzyme linked immunosorbent assay	binary	411	MI:0411 enzyme linked immunosorbent assay	1242	1038
MI:0417	417	footprinting	binary	417	MI:0417 footprinting	14	10
MI:0602	602	chemical footprinting	binary	417	MI:0417 footprinting	0	0
MI:0605	605	enzymatic footprinting	binary	417	MI:0417 footprinting	15	9
MI:0814	814	protease accessibility laddering	binary	417	MI:0417 footprinting	4	2
MI:0901	901	isotope label footprinting	binary	417	MI:0417 footprinting	0	0
MI:1183	1183	nuclease footprinting	binary	417	MI:0417 footprinting	0	0
MI:1191	1191	ultraviolet (uv) footprinting	binary	417	MI:0417 footprinting	0	0
MI:0040	40	electron microscopy	binary	40	MI:0460 rcsb pdb	651	188
MI:0077	77	nuclear magnetic resonance	binary	77	MI:0460 rcsb pdb	993	536
MI:0114	114	x-ray crystallography	binary	114	MI:0460 rcsb pdb	7605	2621
MI:0004	4	affinity chromatography technology	indirect	4	NA	482453	291621
MI:0006	6	anti bait coimmunoprecipitation	indirect	6	NA	45113	27745
MI:0007	7	anti tag coimmunoprecipitation	indirect	7	NA	123708	49428
MI:0016	16	circular dichroism	indirect	16	NA	93	46
MI:0017	17	classical fluorescence spectroscopy	indirect	17	NA	294	107
MI:0019	19	coimmunoprecipitation	indirect	19	NA	4022	1746
MI:0020	20	transmission electron microscopy	indirect	20	NA	663	189
MI:0027	27	cosedimentation	indirect	27	NA	21521	106
MI:0028	28	cosedimentation in solution	indirect	28	NA	867	238
MI:0029	29	cosedimentation through density gradient	indirect	29	NA	2932	793
MI:0038	38	dynamic light scattering	indirect	38	NA	84	42
MI:0042	42	electron paramagnetic resonance	indirect	42	NA	86	1
MI:0043	43	electron resonance	indirect	43	NA	0	0
MI:0047	47	far western blotting	binary	47	NA	2077	1011
MI:0049	49	filter binding	indirect	49	NA	715	473
MI:0051	51	fluorescence technology	indirect	51	NA	351	139
MI:0052	52	fluorescence correlation spectroscopy	binary	52	NA	31	17
MI:0053	53	fluorescence polarization spectroscopy	binary	53	NA	1579	1364
MI:0054	54	fluorescence-activated cell sorting	indirect	54	NA	258	179
MI:0065	65	isothermal titration calorimetry	binary	65	NA	1411	663
MI:0067	67	light scattering	indirect	67	NA	222	58
MI:0069	69	mass spectrometry studies of complexes	indirect	69	NA	745	251
MI:0071	71	molecular sieving	indirect	71	NA	5241	1643
MI:0091	91	chromatography technology	indirect	91	NA	715	90
MI:0096	96	pull down	indirect	96	NA	104592	42423
MI:0097	97	reverse ras recruitment system	indirect	97	NA	268	264
MI:0104	104	static light scattering	indirect	104	NA	65	24
MI:0225	225	chromatin immunoprecipitation array	indirect	225	NA	0	0
MI:0226	226	ion exchange chromatography	indirect	226	NA	648	278
MI:0227	227	reverse phase chromatography	indirect	227	NA	9	5
MI:0254	254	genetic interference	indirect	254	NA	67	23
MI:0255	255	post transcriptional interference	indirect	255	NA	0	0
MI:0256	256	RNA interference	indirect	256	NA	1	1
MI:0257	257	antisense rna	indirect	257	NA	0	0
MI:0276	276	blue native page	indirect	276	NA	938	268
MI:0400	400	affinity technology	indirect	400	NA	1002	60
MI:0401	401	biochemical	indirect	401	NA	48653	40544
MI:0402	402	chromatin immunoprecipitation assays	indirect	402	NA	263	199
MI:0404	404	comigration in non denaturing gel electrophoresis	indirect	404	NA	560	116
MI:0405	405	competition binding	indirect	405	NA	343	176
MI:0406	406	deacetylase assay	indirect	406	NA	76	48
MI:0410	410	electron tomography	indirect	410	NA	1401	470
MI:0412	412	electrophoretic mobility supershift assay	indirect	412	NA	8	2
MI:0413	413	electrophoretic mobility shift assay	indirect	413	NA	56	11
MI:0415	415	enzymatic study	indirect	415	NA	20547	10346
MI:0416	416	fluorescence microscopy	indirect	416	NA	2933	1351
MI:0419	419	gtpase assay	indirect	419	NA	126	9
MI:0420	420	kinase homogeneous time resolved fluorescence	indirect	420	NA	4	2
MI:0423	423	in-gel kinase assay	indirect	423	NA	64	13
MI:0424	424	protein kinase assay	indirect	424	NA	3054	1909
MI:0426	426	light microscopy	indirect	426	NA	9	7
MI:0428	428	imaging techniques	indirect	428	NA	4617	2702
MI:0432	432	one hybrid	indirect	432	NA	1	0
MI:0434	434	phosphatase assay	indirect	434	NA	525	363
MI:0435	435	protease assay	indirect	435	NA	467	220
MI:0437	437	protein tri hybrid	indirect	437	NA	352	11
MI:0439	439	random spore analysis	indirect	439	NA	0	0
MI:0440	440	saturation binding	binary	440	NA	54	27
MI:0441	441	synthetic genetic analysis	indirect	441	NA	0	0
MI:0508	508	deacetylase radiometric assay	indirect	508	NA	0	0
MI:0509	509	phosphatase homogeneous time resolved fluorescence	indirect	509	NA	0	0
MI:0510	510	homogeneous time resolved fluorescence	indirect	510	NA	10	9
MI:0511	511	protease homogeneous time resolved fluorescence	indirect	511	NA	0	0
MI:0512	512	zymography	indirect	512	NA	7	7
MI:0513	513	collagen film assay	indirect	513	NA	0	0
MI:0514	514	in gel phosphatase assay	indirect	514	NA	3	0
MI:0515	515	methyltransferase assay	indirect	515	NA	138	64
MI:0516	516	methyltransferase radiometric assay	indirect	516	NA	39	20
MI:0588	588	3 hybrid method	indirect	588	NA	97	26
MI:0657	657	systematic evolution of ligands by exponential enrichment	indirect	657	NA	0	0
MI:0663	663	confocal microscopy	indirect	663	NA	2148	1109
MI:0676	676	tandem affinity purification	indirect	676	NA	133276	13639
MI:0695	695	sandwich immunoassay	indirect	695	NA	0	0
MI:0696	696	polymerase assay	indirect	696	NA	0	0
MI:0697	697	dna directed dna polymerase assay	indirect	697	NA	1	0
MI:0729	729	luminescence based mammalian interactome mapping	binary	729	NA	2381	2131
MI:0807	807	comigration in gel electrophoresis	indirect	807	NA	58	29
MI:0808	808	comigration in sds page	indirect	808	NA	236	87
MI:0824	824	x-ray powder diffraction	indirect	824	NA	0	0
MI:0825	825	x-ray fiber diffraction	indirect	825	NA	4	2
MI:0826	826	x ray scattering	indirect	826	NA	244	73
MI:0827	827	x-ray tomography	indirect	827	NA	0	0
MI:0841	841	phosphotransferase assay	indirect	841	NA	106	22
MI:0858	858	immunodepleted coimmunoprecipitation	indirect	858	NA	13	10
MI:0859	859	intermolecular force	indirect	859	NA	14	0
MI:0870	870	demethylase assay	indirect	870	NA	18	13
MI:0872	872	atomic force microscopy	indirect	872	NA	47	27
MI:0879	879	nucleoside triphosphatase assay	indirect	879	NA	2	0
MI:0880	880	atpase assay	indirect	880	NA	76	19
MI:0887	887	histone acetylase assay	indirect	887	NA	1	0
MI:0888	888	small angle neutron scattering	binary	888	NA	10	3
MI:0889	889	acetylase assay	indirect	889	NA	43	20
MI:0891	891	neutron fiber diffraction	indirect	891	NA	0	0
MI:0892	892	solid phase assay	indirect	892	NA	1903	152
MI:0893	893	neutron diffraction	indirect	893	NA	0	0
MI:0894	894	electron diffraction	indirect	894	NA	0	0
MI:0920	920	ribonuclease assay	indirect	920	NA	10	4
MI:0928	928	filter trap assay	indirect	928	NA	2	0
MI:0938	938	rheology measurement	indirect	938	NA	0	0
MI:0943	943	detection by mass spectrometry	indirect	943	NA	3	2
MI:0944	944	mass spectrometry study of hydrogen/deuterium exchange	indirect	944	NA	27	12
MI:0946	946	miniaturized immunoprecipitation	indirect	946	NA	276	0
MI:0947	947	bead aggregation assay	indirect	947	NA	3	3
MI:0949	949	gdp/gtp exchange assay	indirect	949	NA	63	32
MI:0953	953	polymerization	indirect	953	NA	5	2
MI:0963	963	interactome parallel affinity capture	indirect	963	NA	701	3
MI:0964	964	infrared spectroscopy	indirect	964	NA	10	9
MI:0965	965	2d-infrared spectrometry	indirect	965	NA	0	0
MI:0966	966	ultraviolet-visible spectroscopy	indirect	966	NA	1	0
MI:0968	968	biosensor	indirect	968	NA	9	5
MI:0969	969	bio-layer interferometry	indirect	969	NA	65	56
MI:0972	972	phosphopantetheinylase assay	indirect	972	NA	0	0
MI:0976	976	total internal reflection fluorescence spectroscopy	indirect	976	NA	0	0
MI:0979	979	oxidoreductase assay MI:0979	indirect	979	NA	17	3
MI:0982	982	electrophoretic mobility-based method	indirect	982	NA	52	45
MI:0983	983	gemma	indirect	983	NA	0	0
MI:0984	984	deamination assay MI:0984	indirect	984	NA	1	0
MI:0989	989	amidase assay	indirect	989	NA	0	0
MI:0990	990	cleavage assay	indirect	990	NA	18	13
MI:0991	991	lipoprotein cleavage assay	indirect	991	NA	3	3
MI:0992	992	defarnesylase assay	indirect	992	NA	0	0
MI:0993	993	degeranylase assay	indirect	993	NA	0	0
MI:0994	994	demyristoylase assay	indirect	994	NA	0	0
MI:0995	995	depalmitoylase assay	indirect	995	NA	0	0
MI:0996	996	deformylase assay	indirect	996	NA	0	0
MI:0997	997	ubiquitinase assay	indirect	997	NA	547	217
MI:0998	998	deubiquitinase assay MI:0998	indirect	998	NA	10	3
MI:0999	999	formylase assay	indirect	999	NA	0	0
MI:1000	1000	hydroxylase assay	indirect	1000	NA	28	28
MI:1001	1001	lipidase assay	indirect	1001	NA	0	0
MI:1005	1005	adp ribosylase assay MI:1005	indirect	1005	NA	2	1
MI:1006	1006	deglycosylase assay	indirect	1006	NA	1	0
MI:1007	1007	glycosylase assay	indirect	1007	NA	21	1
MI:1008	1008	sumoylase assay MI:1008	indirect	1008	NA	20	19
MI:1009	1009	desumoylase assay	indirect	1009	NA	0	0
MI:1010	1010	neddylase assay	indirect	1010	NA	6	6
MI:1011	1011	deneddylase assay	indirect	1011	NA	0	0
MI:1017	1017	RNA immunoprecipitation	indirect	1017	NA	1	1
MI:1019	1019	protein phosphatase assay	indirect	1019	NA	17	5
MI:1022	1022	field flow fractionation	indirect	1022	NA	5	2
MI:1024	1024	scanning electron microscopy	indirect	1024	NA	11	3
MI:1026	1026	diphtamidase assay	indirect	1026	NA	0	0
MI:1028	1028	modified chromatin immunoprecipitation	indirect	1028	NA	0	0
MI:1029	1029	proteomics of isolated chromatin segments	indirect	1029	NA	0	0
MI:1031	1031	protein folding/unfolding	indirect	1031	NA	6	0
MI:1034	1034	nuclease assay	indirect	1034	NA	3	3
MI:1035	1035	deoxyribonuclease assay	indirect	1035	NA	0	0
MI:1036	1036	nucleotide exchange assay	indirect	1036	NA	0	0
MI:1038	1038	silicon nanowire field-effect transistor	indirect	1038	NA	2	2
MI:1086	1086	equilibrium dialysis	indirect	1086	NA	1	1
MI:1087	1087	monoclonal antibody blockade	binary	1087	NA	0	0
MI:1089	1089	nuclear translocation assay	indirect	1089	NA	0	0
MI:1103	1103	solution state nmr	indirect	1103	NA	16	12
MI:1104	1104	solid state nmr	indirect	1104	NA	2	1
MI:1137	1137	carboxylation assay	indirect	1137	NA	3	0
MI:1138	1138	decarboxylation assay MI:1138	indirect	1138	NA	4	2
MI:1142	1142	aminoacylation assay	indirect	1142	NA	4	0
MI:1145	1145	phospholipase assay	indirect	1145	NA	1	0
MI:1147	1147	ampylation assay	indirect	1147	NA	4	4
MI:1184	1184	dna adenine methyltransferase identification	indirect	1184	NA	0	0
MI:1189	1189	methylation interference assay	indirect	1189	NA	0	0
MI:1211	1211	liposome binding assay	indirect	1211	NA	0	0
MI:1218	1218	chromosome conformation capture assay	indirect	1218	NA	0	0
MI:1219	1219	enzyme-mediated activation of radical sources	indirect	1219	NA	0	0
MI:1229	1229	uridylation assay	indirect	1229	NA	0	0
MI:1232	1232	aggregation assay	indirect	1232	NA	2	0
MI:1235	1235	thermal shift binding	binary	1235	NA	16	10
MI:1238	1238	mass spectrometry studies of subunit exchange	indirect	1238	NA	0	0
MI:1246	1246	ion mobility mass spectrometry of complexes	indirect	1246	NA	28	2
MI:1247	1247	mst(micro-scale thermophoresis)	indirect	1247	NA	60	17
MI:1249	1249	isomerase assay	indirect	1249	NA	0	0
MI:1309	1309	de-ADP-ribosylation assay	indirect	1309	NA	0	0
MI:1311	1311	differential scanning calorimetry	indirect	1311	NA	6	1
MI:1312	1312	aut-page	indirect	1312	NA	1	0
MI:1313	1313	proximity labelling technology	indirect	1313	NA	8668	8435
MI:1314	1314	proximity-dependent biotin identification	indirect	1314	NA	8372	8214
MI:1325	1325	sulfurtransferase assay	indirect	1325	NA	0	0
MI:1342	1342	qcmd	indirect	1342	NA	0	0
MI:1352	1352	uracil interference assay	indirect	1352	NA	0	0
MI:1354	1354	lipase assay MI:1354	indirect	1354	NA	8	4
MI:2167	2167	kinetic exclusion assay	indirect	2167	NA	0	0
MI:2168	2168	conditional site labelling	indirect	2168	NA	0	0
MI:2169	2169	luminiscence technology	indirect	2169	NA	0	0
MI:2189	2189	avexis(avidity-based extracellular interaction screening)	indirect	2189	NA	140	8
MI:2196	2196	quartz crystal microbalance	indirect	2196	NA	0	0
MI:2197	2197	probe interaction assay	indirect	2197	NA	0	0
MI:2213	2213	super-resolution microscopy	indirect	2213	NA	2	0
MI:2216	2216	deampylation assay	indirect	2216	NA	0	0
MI:2222	2222	inference by socio-affinity scoring	indirect	2222	NA	0	0
MI:2223	2223	inference by quantitative co-purification	indirect	2223	NA	200	0
MI:2224	2224	chemical rna modification plus base pairing prediction	indirect	2224	NA	0	0
MI:2281	2281	deamidation assay	indirect	2281	NA	2	0
MI:2288	2288	DAP-seq	indirect	2288	NA	0	0
MI:2289	2289	virotrap	indirect	2289	NA	0	0
MI:2290	2290	optical tweezers	indirect	2290	NA	0	0
MI:2291	2291	atomic force microscopy cantilevers	indirect	2291	NA	0	0
MI:2292	2292	magnetic tweezers	indirect	2292	NA	0	0
MI:0000	0	molecular interaction	NotAssigned	1	MI:0001 interaction detection method	228	228
MI:0001	1	interaction detection method	NotAssigned	1	MI:0001 interaction detection method	80	3
MI:0013	13	biophysical	NotAssigned	1	MI:0001 interaction detection method	104	45
MI:0045	45	experimental interaction detection	NotAssigned	1	MI:0001 interaction detection method	370	195
MI:0362	362	inference	NotAssigned	1	MI:0001 interaction detection method	0	0
MI:0363	363	inferred by author	NotAssigned	1	MI:0001 interaction detection method	16741	0
MI:0364	364	inferred by curator	NotAssigned	1	MI:0001 interaction detection method	0	0
MI:0492	492	in vitro	NotAssigned	1	MI:0001 interaction detection method	11968	11968
MI:0493	493	in vivo	NotAssigned	1	MI:0001 interaction detection method	21118	21118
MI:0686	686	unspecified method	NotAssigned	1	MI:0001 interaction detection method	2936	1671
MI:1088	1088	phenotype-based detection assay	NotAssigned	1	MI:0001 interaction detection method	2	0
					TOTAL "Curation Events" included in APID (2):	1520867	701479
(1). When a PPI (pApB) comes from the same PubMed (PMID) but it is assigned to several BINARY detection methods with different but related PSI-MI IDs: the methods are unified to a "common method".
(2). A "curation event" in APID is each unique record derived from the combination of 5 ELEMENTS: protA-protB(PPIid) + paper(PMID) + detectionMethod(MI:id) + sourceDB + sourceDBid
