# Supplementary material for: APID database: redefining protein–protein interaction experimental evidences and binary interactomes
Source: Database (Oxford). 2019 Jan 31;2019:baz005. doi: 10.1093/database/baz005 (PMC6354026; doi:10.1093/database/baz005)
Supplement: Supplementary Table 2 [file database_alonsoetal2018-supplementary-table_s2_baz005.xlsx]

## Sheet: Supp Table S1
Interaction Detection Method TYPE (i.e. Method_Type)	Number of interactions (i.e. unique PPIs)	Percentage
Only Binary	206488	0.262472
Only Indirect	506547	0.643883
Only NotAssigned (NA)	20254	0.0257453
Binary & Indirect	25475	0.0323819
Binary & NA	1945	0.00247233
Indirect & NA	19180	0.0243801
Binary & Indirect & NA	6817	0.00866524
TOTAL number of interactions in APID	786706	1
